# Supplementary material for: Human primed ILCPs support endothelial activation through NF-κB signaling
Source: eLife. 2021 Feb 8;10:e58838. doi: 10.7554/eLife.58838 (PMC7891932; doi:10.7554/eLife.58838)
Supplement: Figure 1—figure supplement 1—source data 1. [file elife-58838-fig1-figsupp1-data1.xlsx]

## Sheet: Figure 1-Figure Supplement 1
Figure 1-Figure Supplement 1b
	CTRL			ILCPs
% of E-Selectin+ HDBECs	21.2	32.7	15.6	73.7	57.8	54.9
% of ICAM-1+ HDBECs	53.9	23.3	21.6	80.3	81.2	85.2
% of VCAM-1+ HDBECs	1.31	2.89	27.8	38.2	55.7	61
Figure 1-Figure Supplement 1d
% of positive cells for:	ex vivo ILCPs				in vitro-expanded ILCPs
NKp44	3.66	0	1.19	0.41	56	52.2	61	73.3
NKp46	67.2	77.9	45.4	40.1	50	89.6	73.3	56.8
CD28	10.2	14.9	14		9.59	7.1	6.16
CD62L	32.3	57.1	55.4	69.5	69.5	70.2	85.2	15.2
CD69	0.17	0.68	0.15	1.23	99.2	98.7	87.8	82.2
CD45RA	73.9	75.2	61.4	82.7	9.81	7.73	15.7	11.3
CD45RO	2.46	0	7.41	5.2	68.6	86	90.1	69.9
CCR6	10.7	24.6	22.8		82.6	45.1	65.4
CXCR5	25.6	20.9	25.9		51.4	45	69.3
NRP1	3.69	0.69	0.82		10.1	3.1	2.33
RORγt	4.88	9.89	12.9	5.3	82.4	31.2	31.6	37.4
Figure 1-Figure Supplement 1e
% of positive cells for:	RORγt+ ILCPs				RORγt- ILCPs
T-bet	15.6	8.76	22.6	15.8	34	29.2	25.2	1.1
GATA3	45.7	56.7	57.3	35.6	50.2	60.2	20.15	29.3
Figure 1-Figure Supplement 1f
	NKp44+ ILCPs			NKp44- ILCPs
% of E-Selectin+ ECs	58.3	51.4	33.1	53.3	35.1	58.9
% of ICAM-1+ ECs	90.4	74.4	64.1	87.1	78.1	78.9
% of VCAM-1+ ECs	42.7	11.2	38.7	37.4	30.5	16
