# Supplementary material for: Human primed ILCPs support endothelial activation through NF-κB signaling
Source: eLife. 2021 Feb 8;10:e58838. doi: 10.7554/eLife.58838 (PMC7891932; doi:10.7554/eLife.58838)
Supplement: Figure 1—figure supplement 2—source data 1. [file elife-58838-fig1-figsupp2-data1.xlsx]

## Sheet: Figure 1-Figure Supplement 2
Figure 1-Figure Supplement 2b
		CTRL			Th1			Th2			Th17			Th*
	% of E-Selectin+ ECs	2.99	0.02	2.9	12.9	11.7	4.1	11.5	13.1	1.5	12	12.4	9.7	11	12.7	4.1
	% of ICAM-1+ ECs	22.3	15.8	9.08	29	16.8	28.2	25	14	14.9	12	11.3	11.3	26.7	16.5	13.2
	% of VCAM-1+ ECs	0.44	1.46	16.4	32.9	18.1	27.4	27	17.3	17.9	16.1	14.5	14.7	24.8	19.6	15.6
