# Supplementary material for: Human primed ILCPs support endothelial activation through NF-κB signaling
Source: eLife. 2021 Feb 8;10:e58838. doi: 10.7554/eLife.58838 (PMC7891932; doi:10.7554/eLife.58838)
Supplement: Figure 1—source data 1. [file elife-58838-fig1-data1.xlsx]

## Sheet: Figure 1
Figure 1b
	CTRL						ILC1s						ILC2s						ILCPs
% of E-Selectin+ ECs	1.14	4.72	10.2	1.94	0.41	1.94	6.27	4.86	6.16	12.4	1.26	5.11	5.895	5.36	1.26	5.11	2.38	1.82	57.9	46.2	37.8	31.1	39.9	31.9
% of ICAM-1+ ECs	12.5	21.1	10.1	2.61	14.9	2.61	37.6	16.8	37.3	22.7	4.33	31.9	11.24	34	4.33	31.9	25.1	11.9	77.8	61.1	73.9	69.6	77.6	80.4
% of vCAM-1+ ECs	3.58	8.5	2.85	5.03	11.12	5.03	25.4	5.51	5.39	19.1	3.78	0.55	6.615	3.92	4.72	19.1	5.6	16.1	56.7	50	37.6	36.1	49.3	41.3
Figure 1c
	CTRL				ILC1s				ILC2s				ILCPs
% of E-Selectin+ ECs	14.04	7.75	2.67	0.41	4.88	2.11	5.75	5.07	3.77	4.55	3.11	0	7.99	0	5.65	2.4
% of ICAM-1+ ECs	29.5	40.9	13.7	14.9	45.1	45.1	46.3	39.4	24.8	22.7	39	31.6	37	62.1	38.2	43.2
% of vCAM-1+ ECs	17	14.1	3.43	5.53	12.2	10.4	9.92	11.1	11.3	9.09	6.5	13.2	10.6	18.2	10.6	8.8
