# Supplementary material for: Human primed ILCPs support endothelial activation through NF-κB signaling
Source: eLife. 2021 Feb 8;10:e58838. doi: 10.7554/eLife.58838 (PMC7891932; doi:10.7554/eLife.58838)
Supplement: Figure 2—figure supplement 1—source data 1. [file elife-58838-fig2-figsupp1-data1.xlsx]

## Sheet: Figure 2-Figure Supplement 1
Figure 2-Figure Supplement 1a
	ILCPs			ILCPs (TW)
IL-6 (pg/mL)	230	270	260	20	70	20
IL-8 (pg/mL)	2930	2470	4130	200	550	400
TNF (pg/mL)	50	10	50	0	20	0
GM-CSF (pg/mL)	80	80	120	0	20	20
IFN-γ (pg/mL)	40	50	40	20	20	10
Figure 2-Figure Supplement 1b
	ex vivo			in vitro-expanded
IL-6 (pg/mL)	5.2	4.16	9.84	7.25	3.23	3.76
IL-8 (pg/mL)	1443	1404	1725	299.54	120.77	145.36
TNF (pg/mL)	2.2	1.42	1.74	2.01	1.98	1.83
GM-CSF (pg/mL)	1.31	1.16	1.42	1.14	0.68	0.68
IFN-γ (pg/mL)	2.49	2.27	2.89	2.18	2.31	2.49
Figure 2-Figure Supplement 1c
	CTRL				ILCP-derived SN
% of E-Selectin+ ECs	0.38	1.14	4.72	1.94	5.35	7.11	7.29	6.31
% of ICAM-1+ ECs	22.1	27.7	24.9	20.1	26	24.2	26.3	35.9
% of VCAM-1+ ECs	2.7	3.58	8.5	2.85	5.07	5.27	5.79	5.61
Figure 2-Figure Supplement 1d
	ILCPs			ILCPs (NF-κBi)
IL-6 (pg/mL)	230	270	260	90	70	60
IL-8 (pg/mL)	2930	2470	4130	1390	1670	1200
TNF (pg/mL)	50	10	50	80	10	70
GM-CSF (pg/mL)	80	80	120	70	60	60
IFN-γ (pg/mL)	40	50	40	20	40	10
IL-6
