# Supplementary material for: Human primed ILCPs support endothelial activation through NF-κB signaling
Source: eLife. 2021 Feb 8;10:e58838. doi: 10.7554/eLife.58838 (PMC7891932; doi:10.7554/eLife.58838)
Supplement: Figure 2—source data 1. [file elife-58838-fig2-data1.xlsx]

## Sheet: Figure 2
Figure 2a
	CTRL				ILCPs
IL-6 (pg/mL)	10	10	20	20	60	270	260	230
IL-8 (pg/mL)	450	250	390	310	2670	2930	2470	4130
TNF (pg/mL)	0	0	0	0	0	50	10	50
GM-CSF (pg/mL)	0	0	0	0	80	80	120	110
IFN-γ (pg/mL)	10	10	0	20	40	20	50	40
Figure 2b
2−ΔCt :	ECs CTRL			ILCP-exposed ECs			ILCPs CTRL			EC-exposed ILCPs
IL-6	0.012892	0.00725163	0.007252	0.151515	0.05492	0.075473	0.000177424	2.83765e-05	0.000688812	0.00292422	0.00100062	2.66045e-05
IL-8	0.00671841	0.00177283	0.001773	0.846039	0.187311	0.175523	0.00119592	0.000344	0.005223	0.0553469	0.014969	2.51e-05
TNF	0.00599671	0.00822575	2.30788e-05	0.00781572	0.00155941	0.00409368	0.114933	0.0838147	0.0467883	0.00376649	0.0233686	0.0124556
GM-CSF	0.004407	0.00493	0.0105471	0.023358	0.00445718	0.00984556	0.009602	0.0868337	0.0158137	0.015189	0.0313321	2.12285e-05
IFN-γ	0.006619	0.006901	0.0467843	0.01432	0.0344928	0.0252629	0.007212	0.141289	0.0117034	0.027784	0.0487093	0.0338705
Figure 2c
	ILCPs						ILCPs (TW)
% of E-Selectin+ ECs	57.9	46.2	37.8	31.1	39.9	31.9	14.6	1.32	3.66	13.2	16.2	4.74
% of ICAM-1+ ECs	77.8	61.1	73.9	69.6	77.6	80.4	10.5	2.57	26.4	29	47.2	27.4
% of VCAM-1+ ECs	56.7	50	37.6	36.1	49.3	41.3	9.39	5.49	11.2	8.7	21.4	10.9
Figure 2d
	ILCPs				EC-ILCP SN
% of E-Selectin+ ECs	70.9	70.3	67.2	47.1	0	0	0	0.78
% of ICAM-1+ ECs	83.5	93.5	76.6	92.2	52.4	49	49.9	51.2
% of VCAM-1+ ECs	71.7	68.3	68.5	43.6	1.69	2.22	1.12	1.78
