# Supplementary material for: Human primed ILCPs support endothelial activation through NF-κB signaling
Source: eLife. 2021 Feb 8;10:e58838. doi: 10.7554/eLife.58838 (PMC7891932; doi:10.7554/eLife.58838)
Supplement: Figure 3—source data 1. [file elife-58838-fig3-data1.xlsx]

## Sheet: Figure 3
Figure 3a
	ILCPs				ILCPs (NF-κBi)
% of E-Selectin+ ECs	51.4	68.9	72.4	62.5	3.72	0.88	1.11	0.87
% of ICAM-1+ ECs	85.1	98.8	90.3	90	24.5	7.46	21.8	2.67
% of VCAM-1+ ECs	76.7	86.3	65.3	81.6	7.85	10.7	5.81	1.04
Figure 3d
% of positive ILCPs for:	ex vivo												in vitro-expanded
BAFF	0.9	0	0	0	0	0	0	0	0	0			0.53	0.35	0.26	0.25
CD30L	3.85	3.45	1.57	5.88	1.39	0	0	3.81	1.22	0.33			0.63	0.43	0.28	0.57
CD40L	0	0	0	0	0	19.6	3.23	3.27	0.15	0			3.69	0.48	3.1	0.26
LTα1β2	42.3	30.8	13.8	27.9	27.8	26.3	4.11	46.1	45.8	16.6	28.9	18.5	0.81	3.91	2.73	4.29
RANKL	7.61	16	19	13.6	31.7								94.8	63.4	70.1	48.8	43.8
Figure 3e
	unstim.				IL-1β
% of RANKL+ ILCPs	33.7	23.5	31	31.6	40.8	52.8	51	68.5
