# Supplementary material for: Human primed ILCPs support endothelial activation through NF-κB signaling
Source: eLife. 2021 Feb 8;10:e58838. doi: 10.7554/eLife.58838 (PMC7891932; doi:10.7554/eLife.58838)
Supplement: Figure 4—figure supplement 1—source data 1. [file elife-58838-fig4-figsupp1-data1.xlsx]

## Sheet: Figure 4-Figure Supplement 1
Figure 4-Figure Supplement 1a
	CTRL			ILCPs
% of RANK+ ECs	9.26	3.5	8.49	52.8	55	43.4
Figure 4-Figure Supplement 1b
	ILCPs			ILCPs (IVIGs)
% of E-Selectin+ ECs	57.9	46.2	37.8	54	73.4	65.5
% of ICAM-1+ ECs	77.8	61.1	73.9	78.7	83.4	91.1
% of VCAM-1+ ECs	56.7	50	37.6	44.7	58.6	53.3
Figure 4-Figure Supplement 1c
	ILCPs			ILCPs (RANK:Fc)
IL-6 (pg/mL)	270	260	230	50	150	206.88
IL-8 (pg/mL)	2930	2470	2070	2580	2350	2194.83
TNF (pg/mL)	50	10	50	0	130	4.23
GM-CSF (pg/mL)	80	120	110	70	60	78.14
IFN-γ (pg/mL)	20	50	40	40	10	1.79
Figure 4-Figure Supplement 1d
	ILCPs			ILCPs (TNFR1:Fc)			ILCPs (TNFR2:Fc)
IL-6 (pg/mL)	270	260	230	360	50	1120	240	50	840
IL-8 (pg/mL)	2930	2470	2070	3730	790	4340	1980	650	2780
TNF (pg/mL)	50	10	50	10	0	70	70	0	320
GM-CSF (pg/mL)	80	120	110	60	10	740	60	10	850
IFN-γ (pg/mL)	20	50	40	20	10	9200	20	20	11140
Figure 4-Figure Supplement 1e
	ILCPs			ILCPs (TNFR1:Fc + TNFR2:Fc)			ILCPs (combo)
IL-6 (pg/mL)	270	260	230	190	70	690	50	110	191.6
IL-8 (pg/mL)	2930	2470	2070	1740	790	2410	420	800	1574.37
TNF (pg/mL)	50	10	50	20	10	70	0	20	40.52
GM-CSF (pg/mL)	80	120	110	60	10	760	20	50	89.45
IFN-γ (pg/mL)	20	50	40	20	20	9360	170	40	2.31
