# Supplementary material for: Human primed ILCPs support endothelial activation through NF-κB signaling
Source: eLife. 2021 Feb 8;10:e58838. doi: 10.7554/eLife.58838 (PMC7891932; doi:10.7554/eLife.58838)
Supplement: Figure 4—source data 1. [file elife-58838-fig4-data1.xlsx]

## Sheet: Figure 4
Figure 4a
	ILCPs			ILCPs (RANK:Fc)
% of E-Selectin+ ECs	57.9	46.2	37.8	43.5	30	26.1
% of ICAM-1+ ECs	77.8	61.1	73.9	62.3	68.1	65.4
% of VCAM-1+ ECs	56.7	50	37.6	59.8	48.6	46.4
Figure 4b
	ILCPs			ILCPs (TNFR1:Fc)			ILCPs (TNFR2:Fc)			ILCPs (combo)
% of E-Selectin+ ECs	46.8	39.9	34.2	28.6	20.7	17.9	22.6	13.2	13	18.7	17.6	12.5
% of ICAM-1+ ECs	62.7	86.5	88.1	34.8	58	57.1	33.9	51.3	44.8	30.4	49.1	42.7
% of VCAM-1+ ECs	62.5	52.7	54.2	26.1	40.7	38.3	28.2	33.3	26.7	23.5	32.9	28.3
Figure 4c
	ILCPs			ILCPs (TNFR1:Fc + TNFR2:Fc)			ILCPs (combo)
% of E-Selectin+ ECs	46.8	39.9	34.2	18.7	17.6	12.5	16.7	10.3	9.52
% of ICAM-1+ ECs	62.7	86.5	88.1	30.4	49.1	42.7	25.3	40	39.4
% of VCAM-1+ ECs	62.5	52.7	54.2	23.5	32.9	28.3	13.8	23.5	23.8
