# Supplementary material for: Human primed ILCPs support endothelial activation through NF-κB signaling
Source: eLife. 2021 Feb 8;10:e58838. doi: 10.7554/eLife.58838 (PMC7891932; doi:10.7554/eLife.58838)
Supplement: Figure 5—source data 1. [file elife-58838-fig5-data1.xlsx]

## Sheet: Figure 5
Figure 5c
n° of adhered cells
	CTRL				ILCP-exposed
CD4+	2231.96	3442.99	4404.41	1443.62	9150.16	7530.19	7451.89	7169.66
CD8+	1112	1499.49	2082.29	676.514	4217.03	3462.94	3341.92	3405.11
CD14+	1710.3	1691.22	1678.88	1203.35	3252.07	2021.16	2851.66	2467.5
CD16+	322.548	462.159	575.013	237.321	1238.64	1081.76	969.645	1040.47
CD19+	118.467	209.889	220.773	72.8705	655.719	381.079	514.891	439.697
Figure 5d
n° of adhered cells
	TNF			TNF_NFkBi day -1			TNF_NFkBi day 0
CD4+	1512	1309	1481	263	49	51	605	286	288
CD8+	1365	1398	1330	213	65	34	520	336	246.4
CD14+	3097	1119	1602	1122	637	370	1555	708	838.4
CD19+	790	579	476	156	47	26	301	133	96
CD56dim CD16+	591	997	865	87	138	95	207	760	304
CD56bright CD16low	11	9	28	3	1	0	7	8	14.4
total ILCs	20	1	10	3	1	1	11	6	8
