# Supplementary material for: Human primed ILCPs support endothelial activation through NF-κB signaling
Source: eLife. 2021 Feb 8;10:e58838. doi: 10.7554/eLife.58838 (PMC7891932; doi:10.7554/eLife.58838)
Supplement: Figure 6—figure supplement 1—source data 1. [file elife-58838-fig6-figsupp1-data1.xlsx]

## Sheet: Figure 6-Figure Supplement 1
Figure 4-Figure Supplement 1b
	ILCPs			ILCPs (SW1116)
% of E-Selectin+ ECs	52.6	53.6	17	24.2	16.2	25.2
% of ICAM-1+ ECs	95.8	96	83	83.9	83	84.5
% of VCAM-1+ ECs	47.4	49.6	14.7	25.4	14	23.9
Figure 4-Figure Supplement 1c
	CTRL			plus TCC-Sup
CD39	1.51	85.5	37.6	2.39	48.5	39.2
CD73	0.55	3.84	2.96	0.5	8.89	2.34
Figure 4-Figure Supplement 1d
2−ΔCt :	ex vivo			in vitro-expanded
A2A	0.0184165	0.007223	0.000769	0.163401	0.015969	0.013187
A2B	0.049579	0.000667	0	0.356852	0.028699	0.035606
A3	0	0	0	0.003053	0.138056	8.46e-05
