# Supplementary material for: Human primed ILCPs support endothelial activation through NF-κB signaling
Source: eLife. 2021 Feb 8;10:e58838. doi: 10.7554/eLife.58838 (PMC7891932; doi:10.7554/eLife.58838)
Supplement: Figure 6—source data 1. [file elife-58838-fig6-data1.xlsx]

## Sheet: Figure 6
Figure 6b
	HD																				NMIBC																				MIBC
ILCPs (% of total ILCs)	13.8	13.2	10.1	10.7	11.1	19.4	7	12.6	5.2	4.3	13.9	11.2	32.6	27.1	21.8	15.5	23.7	40.4	9.4	26.6	17.7	17	46	38.4	43.2	48.2	53.4	50.7	30.9	25	52.4	46.1	33	37.8	34.6	17.9	43.3	26.5	5.3	3	2	9.9	7.3	1.4	1.6	9.1	10.4	6.5	4
Figure 6c
	ILCPs				ILCPs (NMIBC)				ILCPs (MIBC)
% of E-Selectin+ ECs	57.9	46.2	37.8	55.8	11.8	37	27.3	36.9	6.75	14.6	5.12	13.7
% of ICAM-1+ ECs	77.8	61.1	73.9	69.6	45.1	82.2	35.5	48.6	29.2	11.1	8	28.6
% of VCAM-1+ ECs	56.7	50	37.6	36.1	16.6	36.5	23.7	31.8	10.4	2.86	5.21	24.9
Figure 6d
	ILCPs				ILCPs (NMIBC)				ILCPs (MIBC)
IL-6 (pg/mL)	60	270	260	230	300	130	197.724	85.0798	100	30	61.8276	44.8328
IL-8 (pg/mL)	2670	2930	2470	4130	2190	1810	1579.1	1035.96	520	240	394.315	311.122
TNF (pg/mL)	0	50	10	50	0	0	5.566	3.17831	10	0	1.6859	0.805362
GM-CSF (pg/mL)	80	80	120	110	10	10	3.98679	0	0	0	0.0699474	0
IFN-γ (pg/mL)	40	20	50	40	10	10	2.1513	2.50065	40	20	1.23177	1.32703
Figure 6e
% of positive TCC-Sup for:	CTRL			plus ILCPs
CD39	0.79	0.35	0.072	27.6	29.7	31.4
CD73	77.8	60.5	59.5	85.3	90.3	91.1
IDO-1	0.13	0.037	0.051	0.34	0.23	0.37
Figure 6f
	ILCPs			ILCPs (CADO)
% of E-Selectin+ ECs	24.8	33.1	50.3	10.9	8.22	0.68
% of ICAM-1+ ECs	75.8	64.1	61.7	44.2	11.9	50.9
% of VCAM-1+ ECs	54	52.5	27.9	54.8	16.5	7.44
[truncated: 11 more columns]
