# Supplementary figures and images for: Human primed ILCPs support endothelial activation through NF-κB signaling
Source: eLife journal article supplement (doi:10.7554/elife.58838), 2021-02-08

Revised Figure 2-Figure Supplement 1

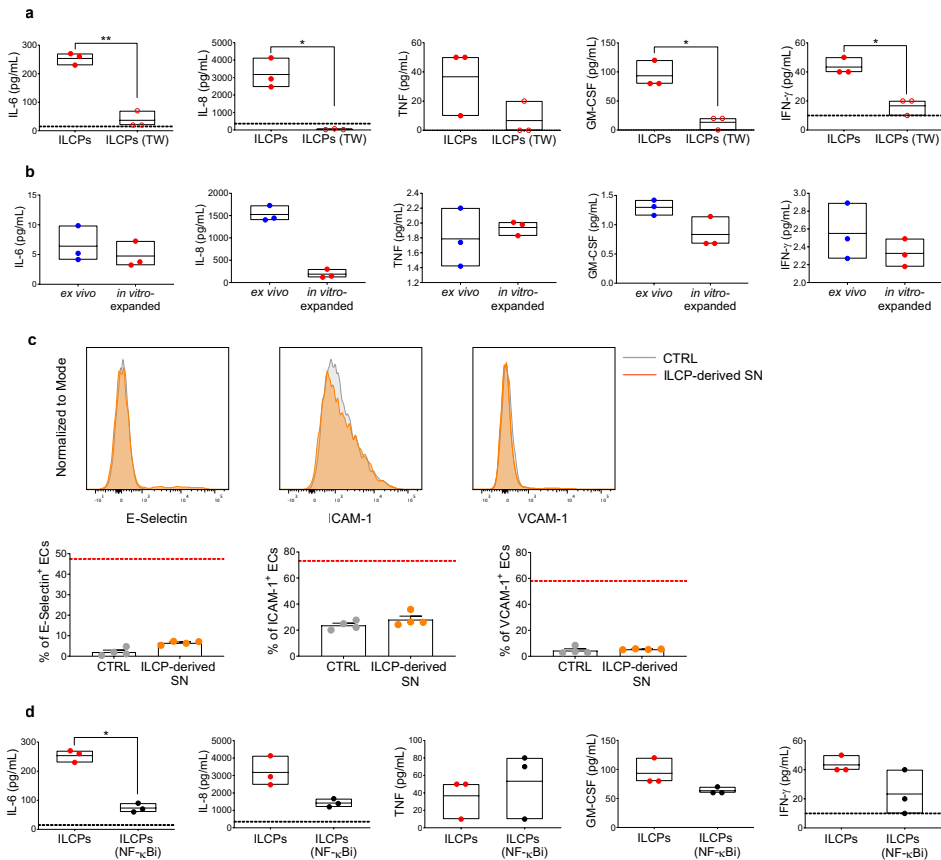

Supplement: supp [file elife-58838-supp-v1.zip]

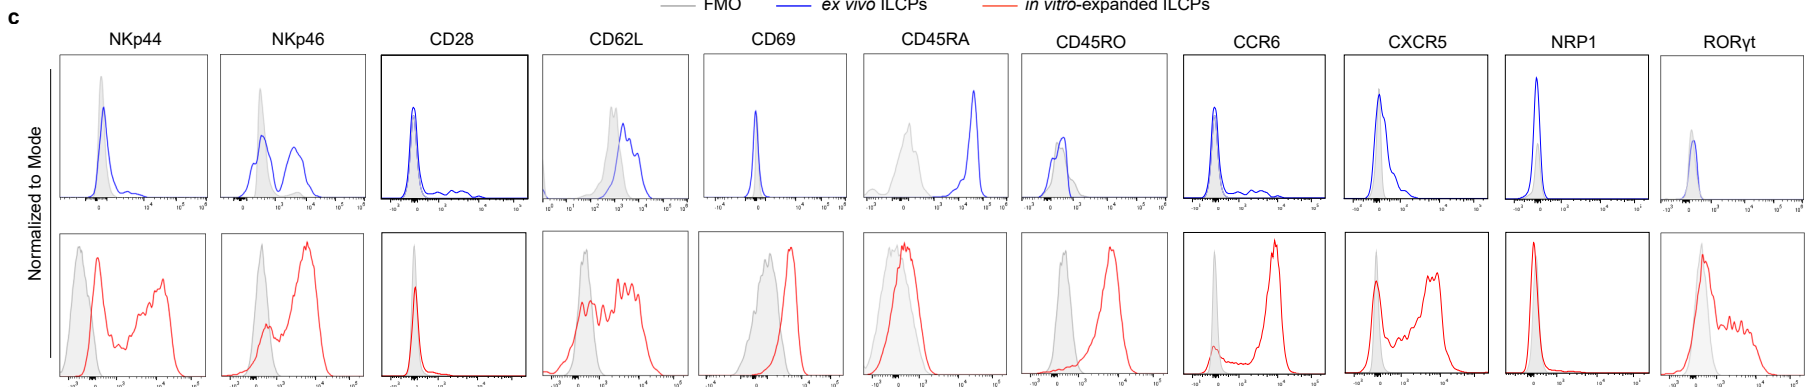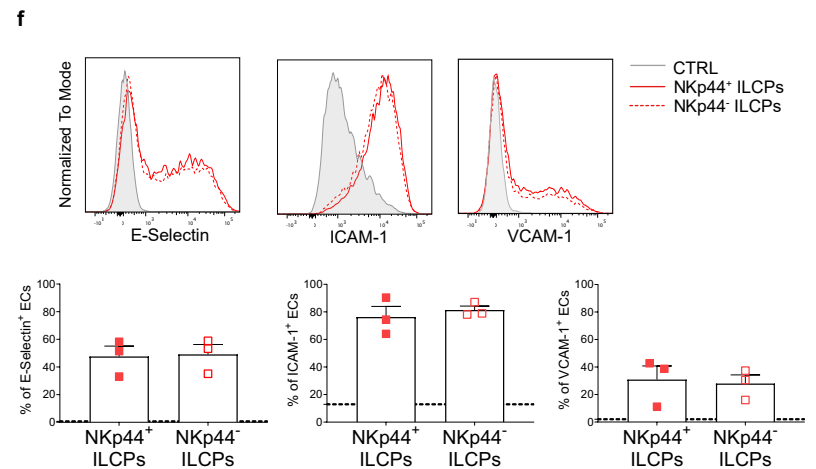

Supplement: supp [file elife-58838-supp-v1.zip]

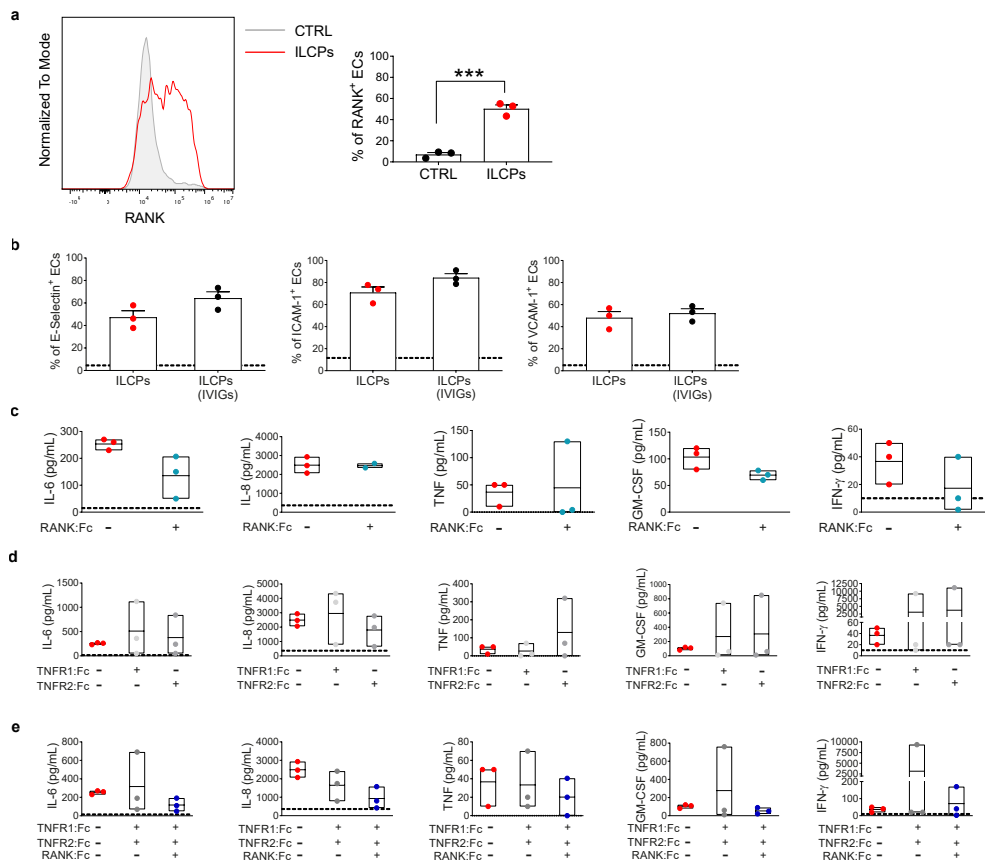

Supplement: supp [file elife-58838-supp-v1.zip]

# Revised Figure 1-Figure Supplement 2

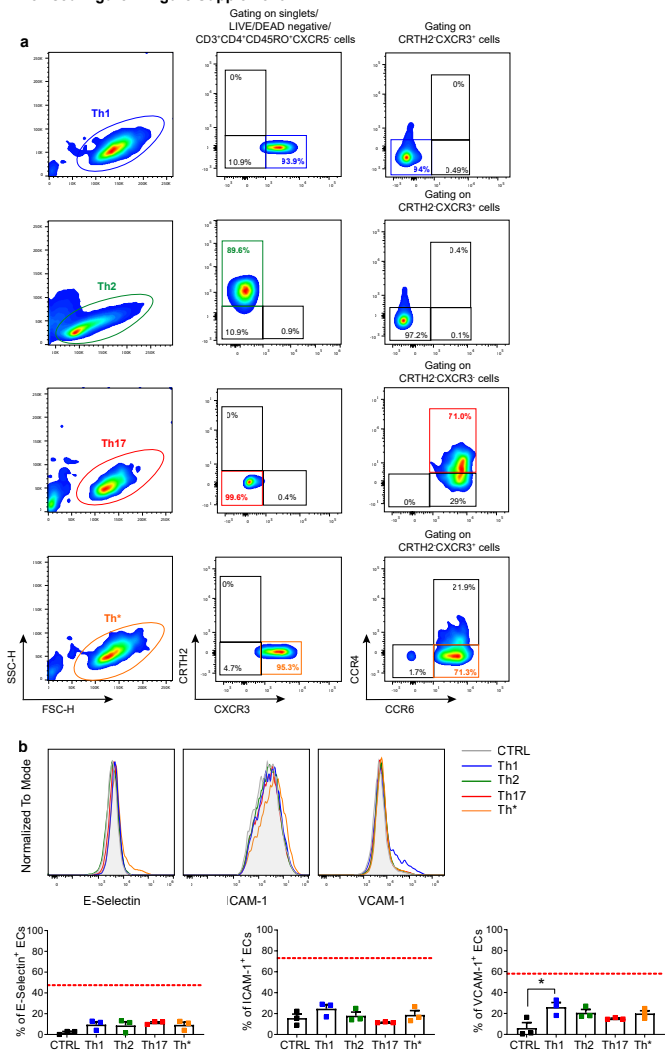

Supplement: supp [file elife-58838-supp-v1.zip]

**Figure 6-Figure Supplement 1**

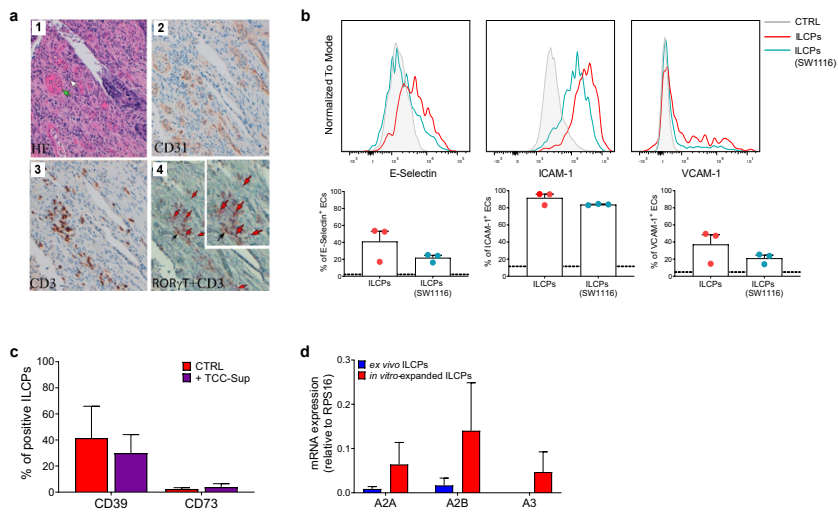

Supplement: supp [file elife-58838-supp-v1.zip]
